# Supplementary material
Source: Springer Nature journal article supplement (https://www.springermedizin.de/resource/supplementary/12990_2009_265_MOESM2_ESM.pdf/9613022)

**A**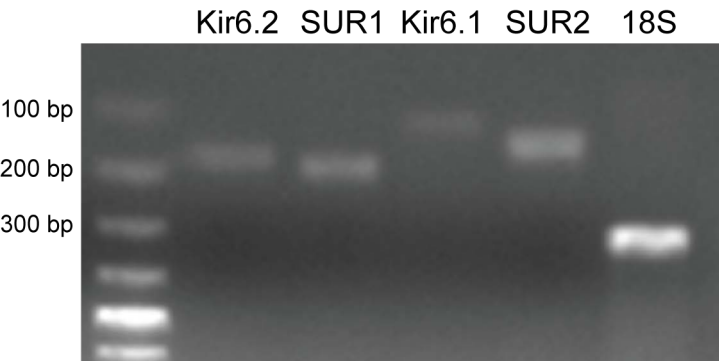**B**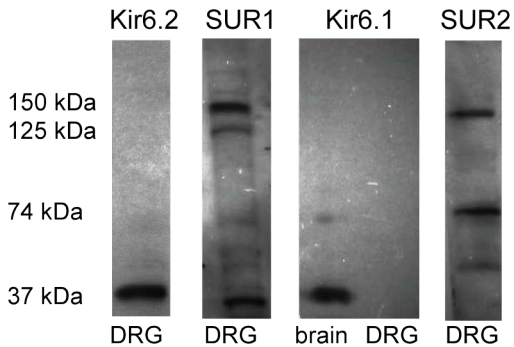

Supplement: MOESM2 [file 9613022]
